# Supplementary material for: Enhancing solubility and stability of sorafenib through cyclodextrin-based inclusion complexation: in silico and in vitro studies
Source: Royal Society of Chemistry journal article supplement (doi:10.1039/d3ra03867j), 2023-01-01
Supplement: d3ra03867j1.pdf [file d3ra03867j1.pdf]

## Supplementary Data

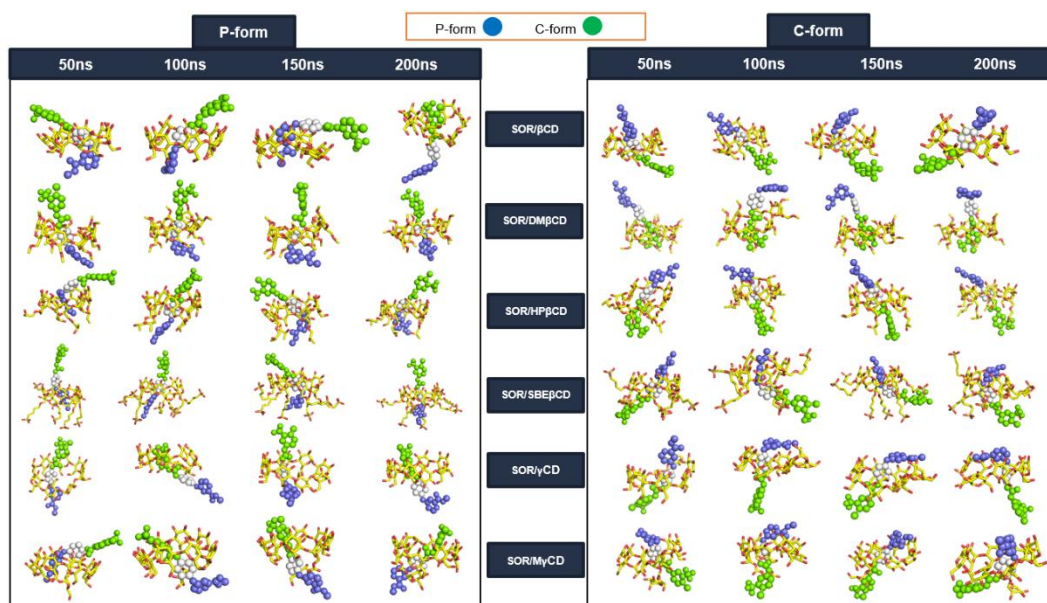

Figure S1. MD1 snapshots of all simulated complexes, taken at 50ns, 100ns, 150ns, and 200ns.

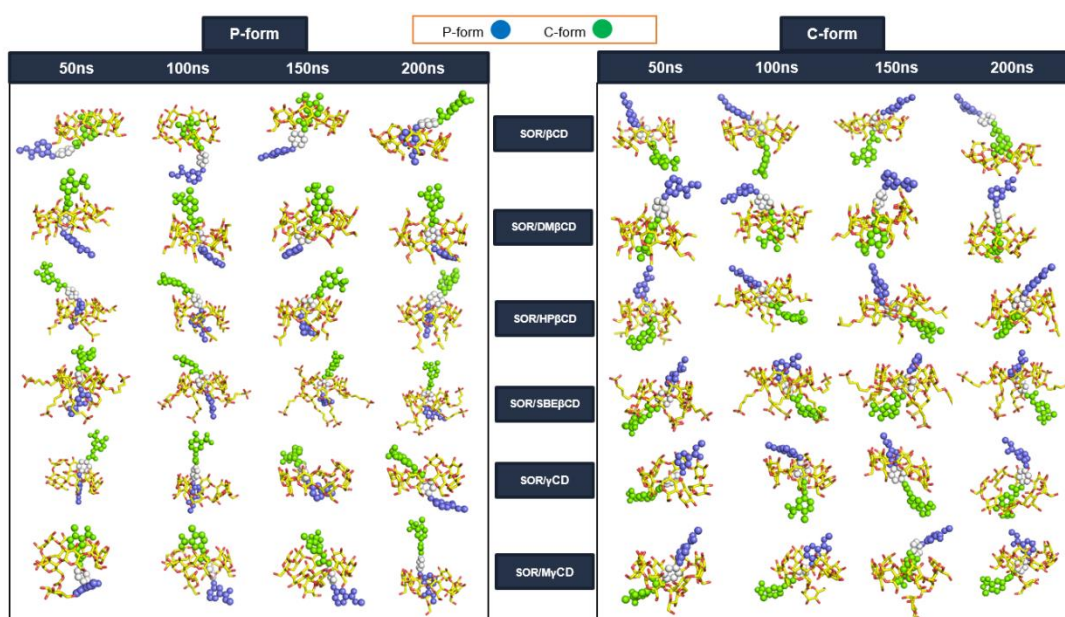

Figure S2. MD2 snapshots of all simulated complexes, taken at 50ns, 100ns, 150ns, and 200ns.

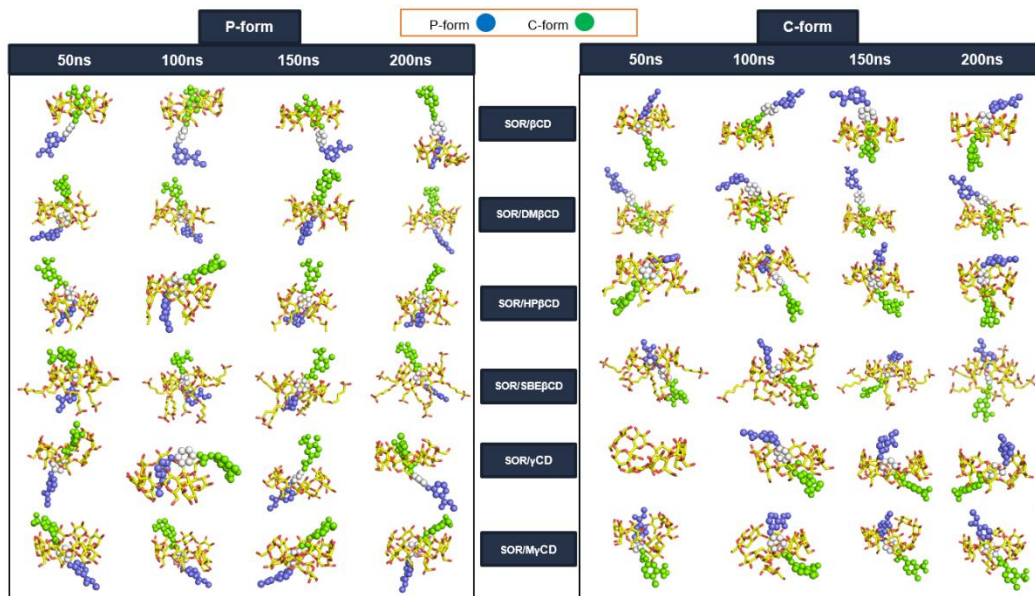

Figure S3. MD2 snapshots of all simulated complexes, taken at 50ns, 100ns, 150ns, and 200ns.

Table S1. Number of contacts and SASA values of all complexes. The data are expressed as mean  $\pm$  standard deviation,  $n = 3$ .

| Complexes                          | Number of contacts |                 | SASA ( $\text{\AA}^2$ ) |                   |
|------------------------------------|--------------------|-----------------|-------------------------|-------------------|
|                                    | P-form             | C-form          | P-form                  | C-form            |
| <b>SOR/<math>\beta</math>CD</b>    | 35.06 $\pm$ 9.2    | 36.29 $\pm$ 9.3 | 338.92 $\pm$ 17.8       | 342.33 $\pm$ 21.2 |
| <b>SOR/DM<math>\beta</math>CD</b>  | 49.33 $\pm$ 8.0    | 39.76 $\pm$ 7.8 | 329.15 $\pm$ 15.9       | 338.51 $\pm$ 20.9 |
| <b>SOR/HP<math>\beta</math>CD</b>  | 46.12 $\pm$ 9.6    | 50 $\pm$ 9.6    | 296.47 $\pm$ 25.6       | 282.23 $\pm$ 19.4 |
| <b>SOR/SBE<math>\beta</math>CD</b> | 49.73 $\pm$ 9.8    | 54.29 $\pm$ 9.1 | 273.77 $\pm$ 27.9       | 250.44 $\pm$ 25.3 |
| <b>SOR/<math>\gamma</math>CD</b>   | 37.89 $\pm$ 9.1    | 41.82 $\pm$ 9.3 | 337.96 $\pm$ 26.6       | 316.5 $\pm$ 26.9  |
| <b>SOR/M<math>\gamma</math>CD</b>  | 42.59 $\pm$ 8.1    | 47.28 $\pm$ 8.6 | 310.35 $\pm$ 23.4       | 306.4 $\pm$ 22.7  |
